# Supplementary material for: Evaluation of fluorescence-based viability stains in scleractinian coral cell cultures
Source: Research Square preprint supplement (doi:10.21203/rs.3.rs-1566667/v1), 2022-04-19
Supplement: Supplementary file 1 [file 3e219039ed5f32cc0431acb1.csv]

Conc	Assay	Molecule	Viability
0	1	TritonX	65.75
0.5	1	TritonX	21.75
1	1	TritonX	23.73
5	1	TritonX	16.86
10	1	TritonX	7.61
50	1	TritonX	4.05
100	1	TritonX	4.14
0	2	TritonX	70.87
0.5	2	TritonX	72.92
1	2	TritonX	52.48
5	2	TritonX	23.08
10	2	TritonX	0
50	2	TritonX	0
100	2	TritonX	0
0	3	TritonX	89.09
0.5	3	TritonX	53.58
1	3	TritonX	38.48
5	3	TritonX	23.12
10	3	TritonX	8.04
50	3	TritonX	16.03
100	3	TritonX	1.04
0	1	Insulin	85.29
0.5	1	Insulin	68.34
1	1	Insulin	62.57
5	1	Insulin	61.14
10	1	Insulin	54.34
50	1	Insulin	52.14
100	1	Insulin	66.08
0	2	Insulin	79.9
0.5	2	Insulin	87.59
1	2	Insulin	97.18
5	2	Insulin	84.57
10	2	Insulin	53.48
50	2	Insulin	40.86
100	2	Insulin	38.66
0	3	Insulin	88.73
0.5	3	Insulin	81.17
1	3	Insulin	77.72
5	3	Insulin	76.74
10	3	Insulin	77.62
50	3	Insulin	66.32
100	3	Insulin	69.04
0	1	TiO2	91.97
0.5	1	TiO2	65.48
1	1	TiO2	55.81
5	1	TiO2	50.05
10	1	TiO2	24.34
50	1	TiO2	23.62
100	1	TiO2	17.81
0	2	TiO2	68.98
0.5	2	TiO2	84.32
1	2	TiO2	76.8
5	2	TiO2	92.71
10	2	TiO2	82.49
50	2	TiO2	35.05
100	2	TiO2	33
0	3	TiO2	86.59
0.5	3	TiO2	82.95
1	3	TiO2	68.43
5	3	TiO2	73.34
10	3	TiO2	60.05
50	3	TiO2	52.09
100	3	TiO2	47.38
