# Supplementary material for: Evaluation of fluorescence-based viability stains in scleractinian coral cell cultures
Source: Research Square preprint supplement (doi:10.21203/rs.3.rs-1566667/v1), 2022-04-19
Supplement: Supplementary file 1 [file d2575a5c1848c80a52b91177.docx]

**Supplemental Materials**

**S.1**. Spectral scans performed on *Pocillopora damicornis* live cells with seven different lasers: 405 nm (**A**); 440 nm (**B**); 458 nm (**C**); 488 nm (**D**); 514 nm (**E**); 561 nm (**F**); 633 nm (**G**). (Zeiss LSM 710, VCU Microscopy Core)

**S.2**. Cytotoxicity data and statistical analysis.

The first sheet of the excel file presents the cytotoxicity data of TiO2 and insulin on *Pocillopora damicornis* cells (Triton X-100 as positive control) for doses from 0.5 to 100 µg/ mL after 24 hours of exposure.

The second sheet present the statistical analysis performed on the data (sheet 1) using R studio.

**S.3**. Transmitted Electron Microscopy image of Titanium dioxide (TiO2) powder.
