# Supplementary material for: Evaluation of fluorescence-based viability stains in scleractinian coral cell cultures
Source: Research Square preprint supplement (doi:10.21203/rs.3.rs-1566667/v1), 2022-04-19
Supplement: Supplementary file 2 [file b894994c15e97cfdcb8c4d68.docx]

**S.1**. Spectral scans performed on *Pocillopora damicornis* live cells with seven different lasers: 405 nm (**A**); 440 nm (**B**); 458 nm (**C**); 488 nm (**D**); 514 nm (**E**); 561 nm (**F**); 633 nm (**G**). (Zeiss LSM 710, VCU Microscopy Core): <https://osf.io/69jpx/>

DOI 10.17605/OSF.IO/69JPX
